# Supplementary material
Source: PubMed Central journal article supplement (PMC3035707)
Supplement: mmc1.pdf [file mmc1.pdf]

Banka et al

The American Journal of Human Genetics, Volume 88

## **Supplemental Data**

### **Identification and Characterization**

### **of an Inborn Error of Metabolism**

### **Caused by Dihydrofolate Reductase Deficiency**

Siddharth Banka, Henk J. Blom, John Walter, Majid Aziz, Jill Urquhart, Christopher M. Clouthier, Gillian I. Rice, Arjan P.M. de Brouwer, Emma Hilton, Grace Vassallo, Andrew Will, Desirée E.C. Smith, Yvo M. Smulders, Ron A. Wevers, Robert Steinfeld, Simon Heales, Yanick J. Crow, Joelle N. Pelletier, Simon Jones, and William G. Newman

**Table S1. Summary of Known Disorders Related to Folate Transport and Metabolism**

| <b>Disorder</b>                                 | <b>Gene</b>  | <b>OMIM</b> | <b>Important clinical features</b>                                                                                                                                                                                                                          | <b>Ref</b> |
|-------------------------------------------------|--------------|-------------|-------------------------------------------------------------------------------------------------------------------------------------------------------------------------------------------------------------------------------------------------------------|------------|
| Hereditary folate malabsorption                 | <i>PCFT</i>  | 611672      | Low blood and CSF folate levels in infancy with anaemia, diarrhoea, immune deficiency, infections and neurological deficits.                                                                                                                                | 1          |
| Cerebral folate transport deficiency            | <i>FOLR1</i> | 136430      | Low CSF folate levels causing neurodegeneration characterized by developmental regression, movement disturbance and leukodystrophy from early childhood.                                                                                                    | 2          |
| Methylene-tetrahydrofolate reductase deficiency | <i>MTHFR</i> | 607093      | Variable age of onset (infancy to adulthood) and severity. Common features are developmental delay, motor and gait abnormalities, seizures, psychiatric manifestations, hyperhomocystinemia, low or normal methionine and absence of megaloblastic anaemia. | 3          |
| Methionine synthase deficiency (CblG)           | <i>MTR</i>   | 156570      | Developmental delay, megaloblastic anaemia with homocystinuria and without methylmalonic aciduria                                                                                                                                                           | 4          |
| Methionine synthase reductase deficiency (CblE) | <i>MTRR</i>  | 602568      | Developmental delay, megaloblastic anaemia with homocystinuria and without methylmalonic aciduria                                                                                                                                                           | 5          |
| Glutamate formyltransferase deficiency          | <i>FTCD</i>  | 606806      | Severe form with developmental delay, seizures, elevated folate levels and presence of FIGLU in urine following administration of histidine. A mild form has also been reported.                                                                            | 6          |

**Table S2. Results of Proband's Investigations that Were Found to Be Normal**

|                                                                                                   |
|---------------------------------------------------------------------------------------------------|
| Hemoglobinopathy screen                                                                           |
| Transferrin isoelectric focusing                                                                  |
| Sialic acid content                                                                               |
| Mucopolysaccharides                                                                               |
| Very long chain fatty acids                                                                       |
| Cholesterol and 7-dehydrocholesterol levels                                                       |
| Plasma glucose and lactate                                                                        |
| Activities of respiratory chain enzyme complexes I, II, III and IV in skeletal muscle             |
| Analysis of common <i>POLG1</i> mutations                                                         |
| Urine organic acids                                                                               |
| Urine, plasma and CSF amino acids                                                                 |
| Plasma ammonia                                                                                    |
| Urine urate, hypoxanthine, xanthine, pseudouridine, uracil, thymine and succinyl adenosine levels |
| Immunoglobulin levels and sub-classes                                                             |
| <i>FOLR1</i> and <i>FOLR2</i> sequencing                                                          |

**Table S3. Regions of Homozygosity Unique to the Proband**

The genomic regions of homozygosity unique to the proband that were identified by autozygosity are shown below. Nucleotide numbers in the table are based on NCBI build 36. The 3Mb region at chromosome 5q14.1 flanked by rs4521453 and rs10059759, containing the *DHFR* gene is highlighted in bold. Importantly, the loci containing potential candidate genes, *TCN2*, *PCFT*, *MTHFR*, *MTR*, *MTRR*, *FOLR1* and *FTCD* were not homozygous in the proband.

| Chromosome        | Nucleotide number start | Cytoband Start | Nucleotide number end | Cytoband End | Size (kbp)     |
|-------------------|-------------------------|----------------|-----------------------|--------------|----------------|
| 1                 | 238,424,796             | q43            | 246,877,270           | q44          | 8,452          |
| 1                 | 171,630,183             | q25.1          | 173,286,248           | q25.1        | 1,656          |
| 2                 | 114,881,944             | q14.1          | 129,097,050           | q14.3        | 14,215         |
| 2                 | 169,755,268             | q31.1          | 180,484,267           | q34          | 10,729         |
| 2                 | 206,487,607             | q31.1          | 211,614,325           | q34          | 5,127          |
| 2                 | 23,481,816              | p24.1          | 26,747,938            | p23.3        | 3,266          |
| 2                 | 232,175,438             | q37.1          | 235,340,542           | q37.3        | 3,165          |
| 3                 | 190,926,256             | q28            | 197,922,334           | q29          | 6,996          |
| 3                 | 117,992,882             | q13.31         | 121,010,467           | q13.33       | 3,017          |
| 3                 | 72,248,225              | p13            | 74,138,367            | p13          | 1,890          |
| 3                 | 95,025,696              | q11.2          | 96,552,879            | q11.2        | 1,527          |
| 5                 | 151,883,873             | q33.1          | 169,885,305           | q35.1        | 18,001         |
| <b>5</b>          | <b>77,664,850</b>       | <b>q13.2</b>   | <b>81,292,374</b>     | <b>q14.1</b> | <b>3,628</b>   |
| 5                 | 26,401,350              | p15.2          | 29,885,156            | p13.3        | 3,484          |
| 7                 | 118,286,776             | q31.31         | 120,492,215           | q31.31       | 2,205          |
| 7                 | 156,716,799             | q36.3          | 158,623,513           | q36.3        | 1,906          |
| 8                 | 121,887,852             | q22.3          | 128,382,683           | q24.21       | 6,495          |
| 8                 | 105,849,484             | q22.3          | 106,838,246           | q24.21       | 989            |
| 9                 | 36,587                  | p24.3          | 10,457,284            | p23          | 10,420         |
| 10                | 2,175,839               | p15.3          | 11,457,616            | p14          | 9,281          |
| 11                | 27,843,969              | p14.1          | 34,309,803            | p13          | 6,465          |
| 11                | 121,538,364             | q23.2          | 122,758,013           | q24.1        | 1,220          |
| 12                | 45,834,102              | q13.11         | 52,587,311            | q15          | 6,753          |
| 14                | 67,404,339              | q24.1          | 75,840,910            | q24.3        | 8,436          |
| 16                | 26,038,708              | p12.1          | 31,567,929            | p11.2        | 5,529          |
| 16                | 45,092,478              | q11.2          | 49,564,860            | q21          | 4,472          |
| 17                | 62,176,152              | q24.2          | 65,719,223            | q24.3        | 3,543          |
| 18                | 3,587,003               | p11.31         | 10,303,579            | p11.21       | 6,717          |
| 19                | 3,049,245               | p13.3          | 6,673,045             | p13.3        | 3,623          |
| 22                | 25,300,902              | q12.1          | 41,427,458            | q13.31       | 16,127         |
| <b>Total size</b> |                         |                |                       |              | <b>179,332</b> |

**Table S4. Primer Sequences for Amplification of *DHFR***

| Exon | Primer                              | Product length |
|------|-------------------------------------|----------------|
| 1    | Forward – TTCGCGCCAAACTTGACCG       | 292            |
|      | Reverse – AAAAGGGGAATCCAGTCGG       |                |
| 2    | Forward – CGACTGGATTCCCCTTTTC       | 476            |
|      | Reverse – ATAATTTGCTCGTGCGTTG       |                |
| 3    | Forward – AGCATGCAGACTCCACACAG      | 373            |
|      | Reverse – GCAGCTTCATCAATAGCTCCTT    |                |
| 4    | Forward – GGTCAGAGGCCATACTGATG      | 434            |
|      | Reverse – CAGTACAGATAATGTGCTGCTTC   |                |
| 5    | Forward – GGCAGCACCAAGCATATTTT      | 351            |
|      | Reverse – GCACCCATCATCCTAGCAGT      |                |
| 6    | Forward – CCAACTTGACAGTGGCTTACC     | 394            |
|      | Reverse – GCAAGAATGTCTCATAAATGGTATC |                |

Note: Annealing temperature of 55°C was used for all the primer pairs. The same primers were used for bidirectional sequencing.

**Table S5. Primers for QPCR of *DHFR*, *GUSB* and *PPIB***

| Gene        | Gene ID     | Primer sequence                  |
|-------------|-------------|----------------------------------|
| <i>DHFR</i> | NM_000791.3 | Forward – GTTCCTGGGAGCACCTTTTC   |
|             |             | Reverse – ATGCAGACAGTGCCAGCTC    |
| <i>GUSB</i> | NM_000181.1 | Forward -AGAGTGGTGCTGAGGATTGG    |
|             |             | Reverse – CCCTCATGCTCTAGCGTGTC   |
| <i>PPIB</i> | NM_000942.4 | Forward -CGGAAAGACTGTTCCAAAAC    |
|             |             | Reverse - GATTACACGATGGAATTTGCTG |

**Figure S1. Proband's Peripheral Blood Films**

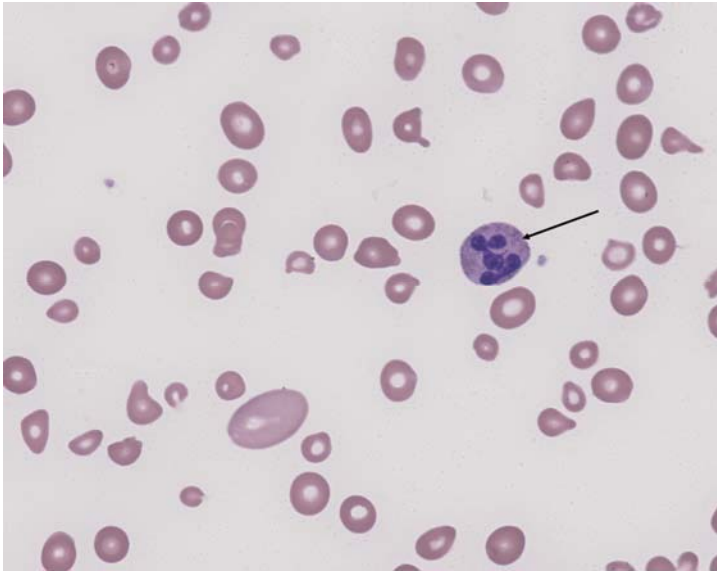

1A Proband's peripheral blood film at diagnosis with modified Wright's stain at 500x magnification showing a hypersegmented neutrophil (marked by arrow) with macrocytic red cells, red cell fragments, marked poikilocytosis and anisocytosis.

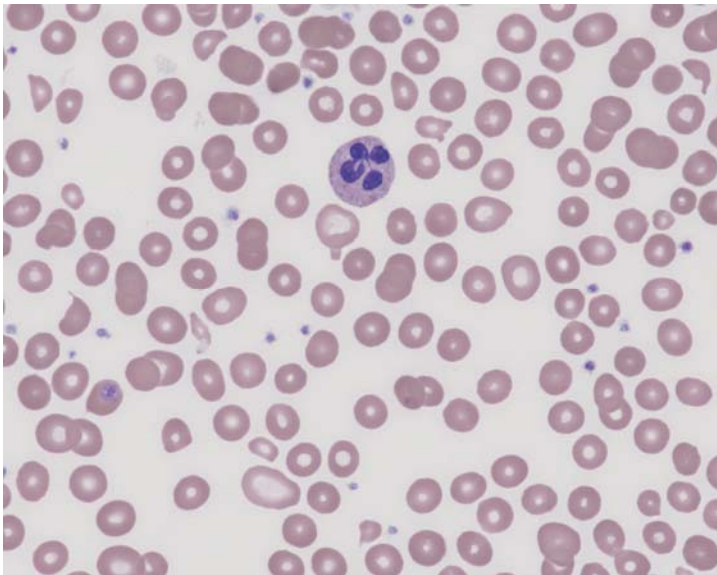

1B. Proband's peripheral blood film after treatment.

**Figure S2. ClustalW Alignment of DHFR Protein Sequence from Human, Mouse, Chicken, Zebra-fish and *Drosophila***

Nucleotide phosphate binding sites are highlighted in green. Leucine (L) at position 80, the residue disrupted by mutations in our patients is highlighted in red demonstrating its conservation at least to *Drosophila*.

```

P00374 | HUMAN          MVGSLNCIVAVSQNMGI GKNGLPW PPLR--NEFRYFQRMTTSSVEGKQNLVIMGKKTW 58
P00375 | MOUSE         MVRPLNCIVAVSQNMGI GKNGLPW PPLR--NEFKYFQRMTTSSVEGKQNLVIMGRKTW 58
P00378 | CHICKEN       -VRSLSNIVAVCQNMGI GKDGNLPW PPLR--NEYKYFQRMTSTSHVEGKQNAVIMGKKTW 57
Q6IQS4 | ZEBRAFISH     MSRI LNCIVAVCPDMGI GKNGLPWHPIRLSNELKHFQKMTMTPSDEGKKNVVIMGRKTW 60
P17719 | DROSOPHILA    MLR-FNLIVAVCENFGI GIRGDLPWRIKS---ELKYFSRTTKRTSDPTKQNAVVMGRKTY 56
                   :* ****. ::* **  *:* **      * :*: * .      *:* *:* **:*:

P00374 | HUMAN          FSIPEKNRPLKGRINLVLSREI KE P--PQGAHF LSRSLDDALKLTEQPELANKVDMVWIV 116
P00375 | MOUSE         FSIPEKNRPLKDRINIVLSREI KE P--PRGAHF LAKSLDDALRLIEQPELASKVDMVWIV 116
P00378 | CHICKEN       FSIPEKNRPLKDRINIVLSREI KEA--PKGAYHLSKSLDDALALLDSPELKS KVDMVWIV 115
Q6IQS4 | ZEBRAFISH     FSIPAHRPLKNRINIVLSREI KTA--PEGAHYLASDFSSALHLLDSGELEKLV DQVWII 118
P17719 | DROSOPHILA    FGVPE SKRPLPDRLNIVLS TTI QESDL PKG-VLLCENLETAMKILEE---QNEVENI WIV 112
                   *.:* :*** *:*:* ** *:. . *. * . . . *: :. . . *:* :**:*

P00374 | HUMAN          GGSSVYKEAMNHPGHLKLFVTRIMQDFESDFFF PEIDLEKYKLLPEY PGVLSDVQEEKGI 176
P00375 | MOUSE         GGSSVYQEAMNQPGHLR L FVTRIMQEFESDFFF PEIDLGKYKLLPEY PGVLSEVQEEKGI 176
P00378 | CHICKEN       GGTAVYKAAMEKPINHRL FVTRILHEFESDFFF PEIDYKDFKLLTEY PGVPADIQEE DGI 175
Q6IQS4 | ZEBRAFISH     GGSSLYKEVMERSGHRRL FVTRILKQFDCDTFI PNFDMDKYKLLPEF PGVPVGLQEDNGV 178
P17719 | DROSOPHILA    GGSGVYEEAMASPRCHRLYITKIMQKFCDCDTFI PAIP-DSFREVA PDSMPLGVQEENGI 171
                   **:.:* :.* . :*:*:*:*:*:*:*:* * : .:. . . . :**:*:*

P00374 | HUMAN          KYKFEVYEKND--- 187
P00375 | MOUSE         KYKFEVYEKKD--- 187
P00378 | CHICKEN       QYKFEVYQKSVLAQ 189
Q6IQS4 | ZEBRAFISH     QYLFEVYESIKH-- 190
P17719 | DROSOPHILA    KFEYKILEKHS--- 182
                   :: ::: :.
    
```

**Figure S3. Summarised Representation of the Consequences of Loss of Activity of DHFR**

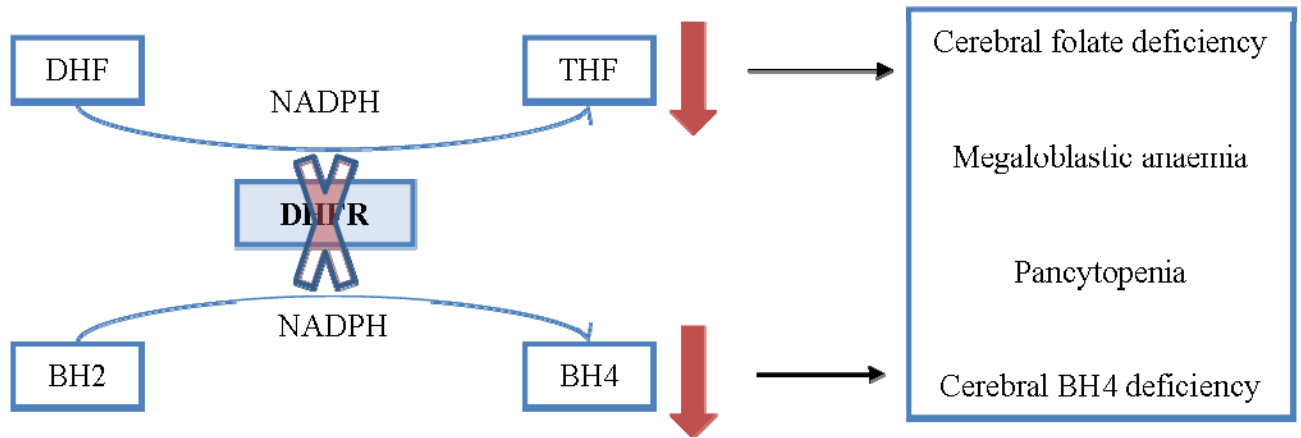



### Supplemental References

1. Qiu A., Jansen M., Sakaris A., Min S.H., Chattopadhyay S., Tsai E., Sandoval C., Zhao R., Akabas M.H., Goldman I.D. (2006) Identification of an Intestinal Folate Transporter and the Molecular Basis for Hereditary Folate Malabsorption. *Cell*. 127, 917-928.
2. Steinfeld R., Grapp M., Kraetzner R., Dreha-Kulaczewski S., Helms G., Dechent ., Wevers R., Grosso S., Gärtner J. (2009) Folate Receptor Alpha Defect Causes Cerebral Folate Transport Deficiency: A Treatable Neurodegenerative Disorder Associated with Disturbed Myelin Metabolism. *Am. J. Hum. Genet.* 85, 354-363.
3. Goyette P., Sumner J.S., Milos R., Duncan A.M.V., Rosenblatt D.S., Matthews R.G., Rozen R. (1994) Human methylenetetrahydrofolate reductase: isolation of cDNA, mapping and mutation identification. *Nat. Genet.* 7, 195-200.
4. Gulati S., Baker P., Li Y.N., Fowler B., Kruger W., Brody L.C., Banerjee R. (1996) Defects in human methionine synthase in cblG patients. *Hum. Mol. Genet.* 5,1859-1865.
5. Leclerc D., Wilson A., Dumas R., Gafuik C., Song D., Watkins D., Heng H.H.Q., Rommens J.M., Scherer S.W., Rosenblatt D.S., Gravel R.A. (1998) Cloning and mapping of a cDNA for methionine synthase reductase, a flavoprotein defective in patients with homocystinuria. *Proc. Natl. Acad. Sci. U. S. A.* 95, 3059-3064.
6. Hilton J.F., Christensen K.E., Watkins D., Raby B.A., Renaud Y., de la Luna S., Estivill X., MacKenzie R.E., Hudson T.J., Rosenblatt D.S. (2003) The molecular basis of glutamate formiminotransferase deficiency. *Hum. Mut.* 22, 67-73.
